# Supplementary material for: Polypyrrole-coated cobalt sulfide as an effective host for sulfur cathode
Source: Royal Society of Chemistry journal article supplement (doi:10.1039/d3ce01318a), 2024-01-01
Supplement: d3ce01318a1.pdf [file d3ce01318a1.pdf]

## **Polypyrrole coated cobalt sulfide as an effect host for sulfur cathode**

Fengjin Yi<sup>a</sup>, Baorui Jia<sup>a</sup>, Ruoqi Song<sup>a</sup>, Jihui Zhang<sup>a</sup>, Mei Li<sup>a</sup>, Weiliang Liu<sup>a</sup>,

Jinshui Yao<sup>a</sup>, Jiayi Cui<sup>c</sup>, Yuanhao Wang<sup>b\*</sup>, Manman Ren<sup>a\*</sup>

<sup>a</sup> School of Materials Science and Engineering, Qilu University of Technology  
(Shandong Academy of Sciences), Jinan 250353, PR China

<sup>b</sup> Hoffmann Institute of Advanced Materials, Shenzhen Polytechnic, 7098 Liuxian  
Boulevard, Nanshan District, Shenzhen 518055, P. R. China

<sup>c</sup> Institute of Fundamental and Frontier Sciences, University of Electronic Science and  
Technology of China, Chengdu 610054, China

\* Corresponding Authors: wangyuanhao@szpt.edu.cn, renmanman@qlu.edu.cn

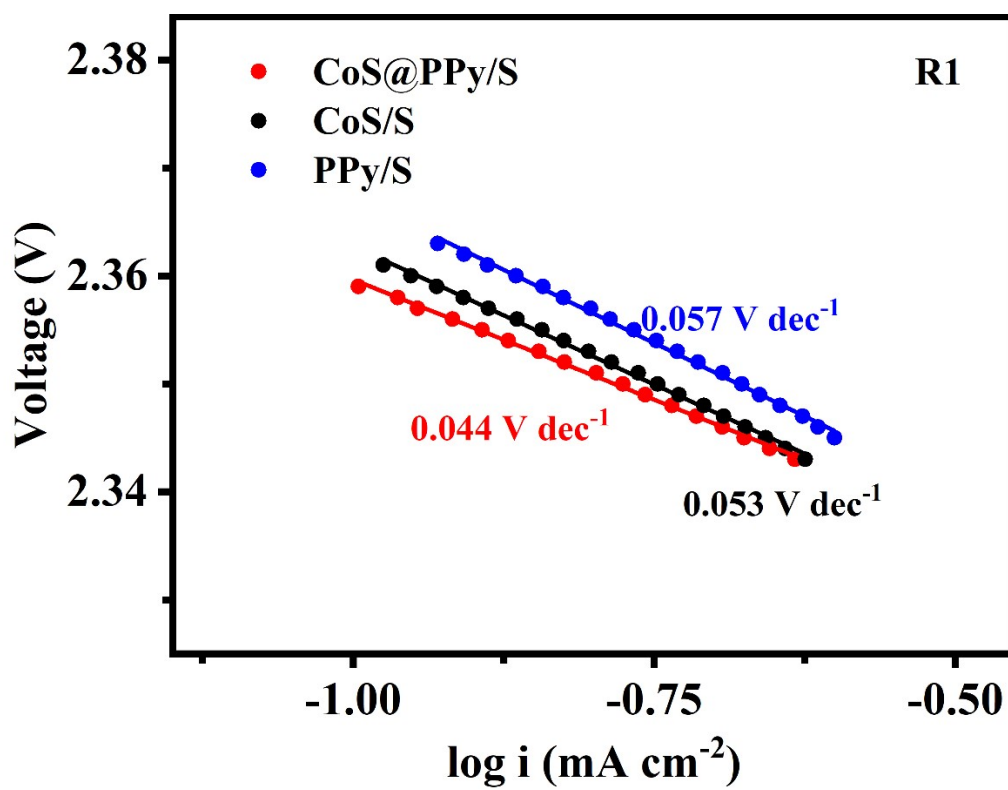

Fig. S1. Tafel plots calculated from the reduction peak R1.

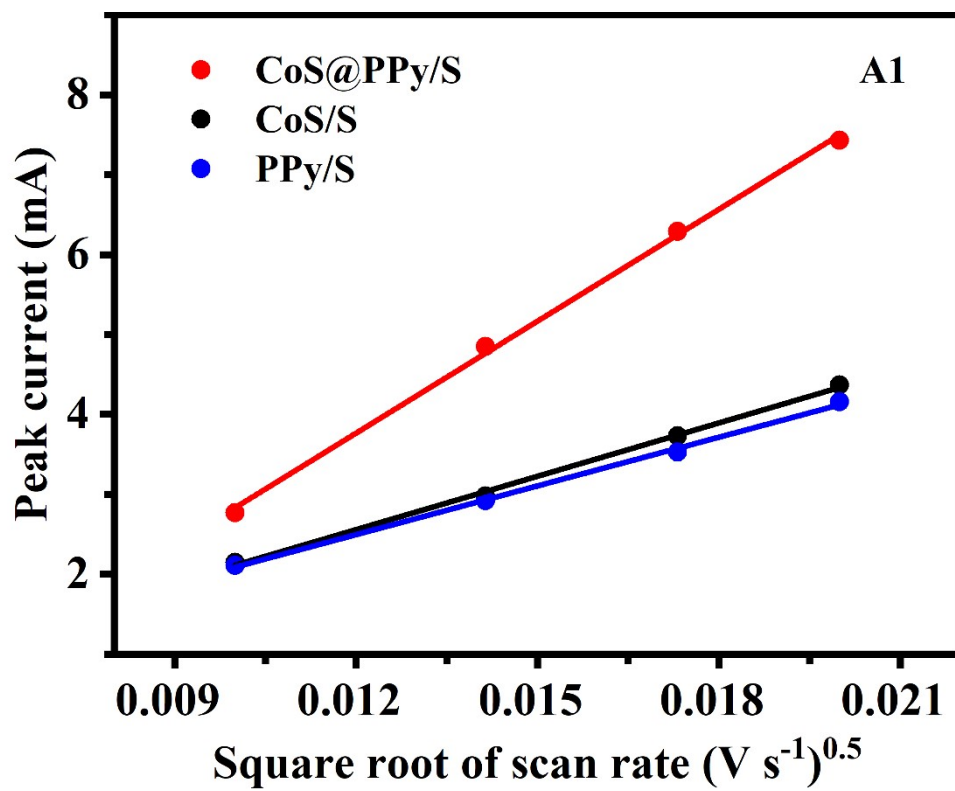

**Fig. S2.** The peak current values of peak A1 versus the square root of scan rates of the CoS@PPy/S, CoS/S, and PPy/S electrodes.

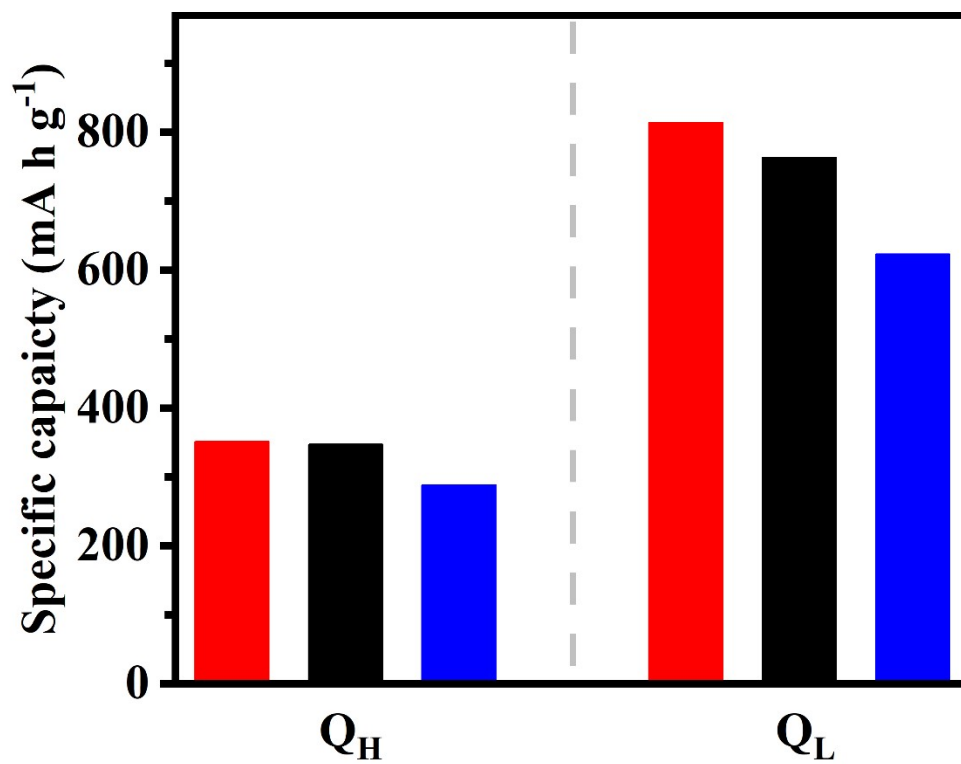

Fig. S3. Values of Q<sub>H</sub> and Q<sub>L</sub> in different electrodes

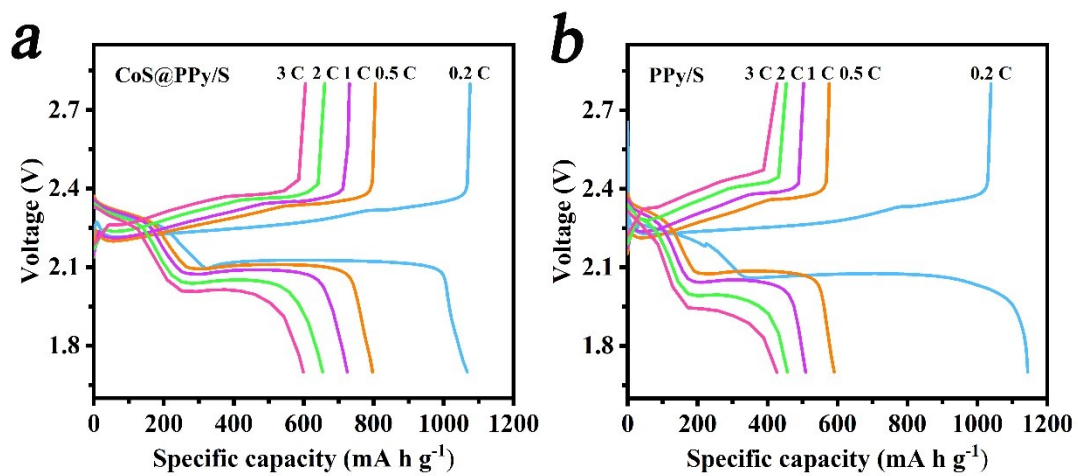

**Fig. S4.** Galvanostatic charge-discharge curves of (a) CoS@PPy/S and (b) PPy/S electrodes under different C-rates.

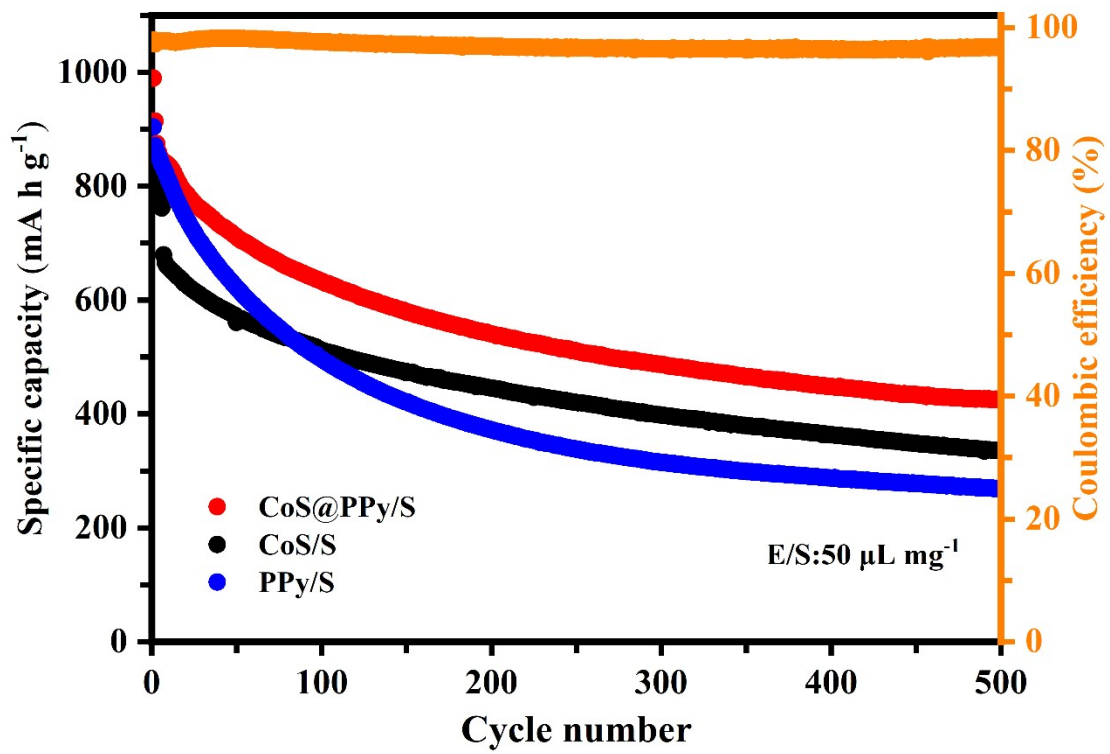

Fig. S5. Cycling performance of the three electrodes at 0.5 C.

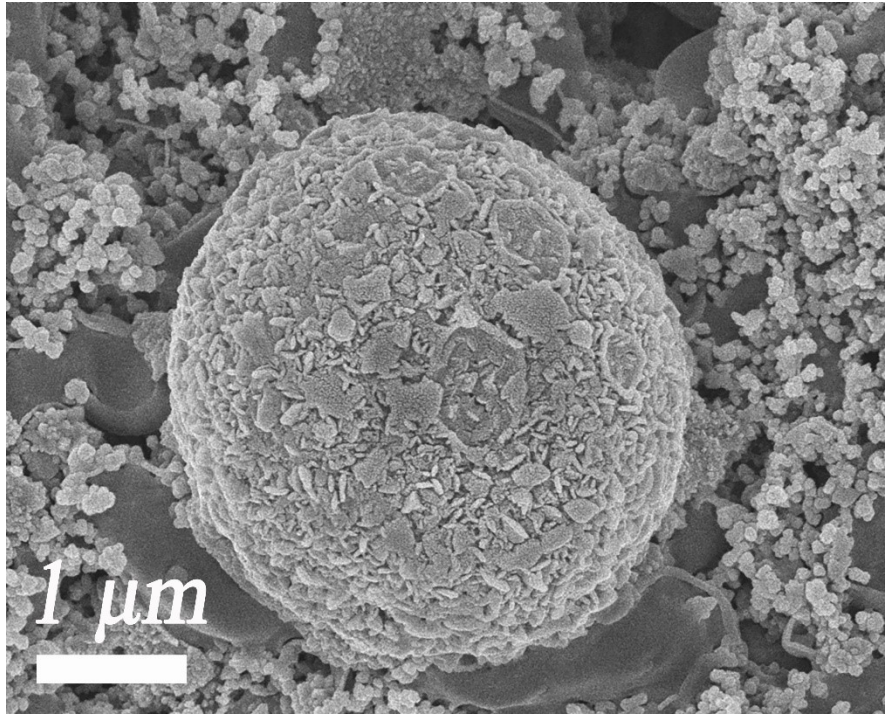

**Fig. S6.** SEM images of the CoS@PPy/S cathodes after 100 cycles.

**Table S1.** Lithium-ion diffusion rates ( $D_{\text{Li}^+}$ ,  $\text{cm}^2 \text{s}^{-1}$ ) between CoS@PPy/S, CoS/S and PPy/S electrodes

| Sample  | A1                    | A2                    | C1                    | C2                    |
|---------|-----------------------|-----------------------|-----------------------|-----------------------|
| CoS@PPy | $2.84 \times 10^{-7}$ | $6.00 \times 10^{-7}$ | $8.24 \times 10^{-8}$ | $2.95 \times 10^{-8}$ |
| CoS     | $6.70 \times 10^{-8}$ | $1.23 \times 10^{-7}$ | $1.90 \times 10^{-8}$ | $1.79 \times 10^{-8}$ |
| PPy     | $5.57 \times 10^{-8}$ | $1.16 \times 10^{-7}$ | $1.87 \times 10^{-8}$ | $1.39 \times 10^{-8}$ |



**Table S2.** Comparison with the related works in literature

| Sample                                                  | S Loading<br>(mg cm <sup>-2</sup> ) | Rate<br>(C) | Specific Capacity<br>(mA h g <sup>-1</sup> ) | Ref       |
|---------------------------------------------------------|-------------------------------------|-------------|----------------------------------------------|-----------|
| CoS@PPy/S                                               | 1.1                                 | 2/3         | 678/625                                      | This work |
| CoS/G/S                                                 | 1.2-1.8                             | 1/1.5       | 542/501                                      | 1         |
| CoMoS <sub>3</sub> /CoS/S                               | 1.0                                 | 2           | 512                                          | 2         |
| CoS/MWCNT-S                                             | 1.0-1.5                             | 1/2         | 762/642                                      | 3         |
| Hollow CoS/S                                            | 1.0-1.5                             | 1/2         | 714/447                                      | 4         |
| CoS@rGO/S                                               | 0.8-1.6                             | 1/2         | 691/602                                      | 5         |
| CoS <sub>2</sub> /Fe <sub>7</sub> S <sub>8</sub> /NG-PP | 1.0-1.4                             | 2/3         | 620/555                                      | 6         |
| TiO <sub>2</sub> /S@PPy                                 | 2.0                                 | 1/2         | 586/402                                      | 7         |
| PPy-AB/S                                                | 1.3-1.8                             | 1/2         | 688/663                                      | 8         |
| PPy/ZnO interlayer                                      | 1.3                                 | 1.5/2       | 501/404                                      | 9         |

## References:

- 1 Z. Yu, N. Zhang, X. Zhang, Y. Li, G. Xie, W. Ge, L. Zhang and T. Zhang, *J. Electroanal. Chem.*, 2019, **854**, 113524.
- 2 L. Yu, Y. Qu, R. Dang, Z. Ma, L. Duan and W. Lü, *J. Electroanal. Chem.*, 2022, **907**, 116025.
- 3 B. Zhang, S. Zhao, Z. Tang, P. Xie, A. Natarajan, Y. Zhou and X. Tian, *J Solid State Electrochem*, 2021, **26**, 389-400.
- 4 Y. Yu, L. Zhang, Y. Yan, X. Gao, S. Liu and R. Xu, *Journal of Materials Science: Materials in Electronics*, 2022, **33**, 20479-20486.
- 5 C. Gao, C. Fang, H. Zhao, J. Yang, Z. Gu, W. Sun, W. Zhang, S. Li, L. Xu, X. Li and F. Huo, *J. Power Sources*, 2019, **421**, 132-138.
- 6 P. Chen, T. Wang, F. Tang, G. Chen and C. Wang, *Chem. Eng. J.*, 2022, **446**, 136990.
- 7 H. Song, H. Yuan, H. Chen, A. Tang, G. Xu, L. Liu, Z. Zhang and Q. Kuang, *J Solid State Electrochem*, 2020, **24**, 997-1006.
- 8 W. Qin, B. Fang, S. Lu, Z. Wang, Y. Chen, X. Wu and L. Han, *RSC Advances*, 2015, **5**, 13153-13156.
- 9 F. Yin, J. Ren, Y. Zhang, T. Tan and Z. Chen, *Nanoscale Res. Lett.*, 2018, **13**, 307.
